# Supplementary material for: Changes to postdiagnostic dementia support in England and Wales during the COVID-19 pandemic: a qualitative study
Source: PubMed Central journal article supplement — BMJ Open. 2022 Feb 2;12(2):e059437. doi: 10.1136/bmjopen-2021-059437 (PMC8811272; doi:10.1136/bmjopen-2021-059437), 2022-02-02
Supplement: bmjopen-2021-059437.draft_revisions.pdf [file bmjopen-2021-059437.draft_revisions.pdf]

# BMJ Open

BMJ Open is committed to open peer review. As part of this commitment we make the peer review history of every article we publish publicly available.

When an article is published we post the peer reviewers' comments and the authors' responses online. We also post the versions of the paper that were used during peer review. These are the versions that the peer review comments apply to.

The versions of the paper that follow are the versions that were submitted during the peer review process. They are not the versions of record or the final published versions. They should not be cited or distributed as the published version of this manuscript.

BMJ Open is an open access journal and the full, final, typeset and author-corrected version of record of the manuscript is available on our site with no access controls, subscription charges or pay-per-view fees (<http://bmjopen.bmj.com>).

If you have any questions on BMJ Open's open peer review process please email [info.bmjopen@bmj.com](mailto:info.bmjopen@bmj.com)

# BMJ Open

## Changes to post-diagnostic dementia support in England and Wales during the COVID-19 pandemic: a qualitative study

|                               |                                                                                                                                                                                                                                                                                                                                                                                                                               |
|-------------------------------|-------------------------------------------------------------------------------------------------------------------------------------------------------------------------------------------------------------------------------------------------------------------------------------------------------------------------------------------------------------------------------------------------------------------------------|
| Journal:                      | <i>BMJ Open</i>                                                                                                                                                                                                                                                                                                                                                                                                               |
| Manuscript ID                 | bmjopen-2021-059437                                                                                                                                                                                                                                                                                                                                                                                                           |
| Article Type:                 | Original research                                                                                                                                                                                                                                                                                                                                                                                                             |
| Date Submitted by the Author: | 19-Nov-2021                                                                                                                                                                                                                                                                                                                                                                                                                   |
| Complete List of Authors:     | Wheatley, Alison; Newcastle University Faculty of Medical Sciences, Population Health Sciences Institute<br>Poole, Marie; Newcastle University Faculty of Medical Sciences, Population Health Sciences Institute<br>Robinson, Louise; Newcastle University Faculty of Medical Sciences, Population Health Sciences Institute<br>(collaborator group), The PriDem study team; Newcastle University Faculty of Medical Sciences |
| Keywords:                     | Dementia < NEUROLOGY, COVID-19, QUALITATIVE RESEARCH                                                                                                                                                                                                                                                                                                                                                                          |
|                               |                                                                                                                                                                                                                                                                                                                                                                                                                               |

SCHOLARONE™  
Manuscripts

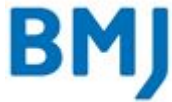

I, the Submitting Author has the right to grant and does grant on behalf of all authors of the Work (as defined in the below author licence), an exclusive licence and/or a non-exclusive licence for contributions from authors who are: i) UK Crown employees; ii) where BMJ has agreed a CC-BY licence shall apply, and/or iii) in accordance with the terms applicable for US Federal Government officers or employees acting as part of their official duties; on a worldwide, perpetual, irrevocable, royalty-free basis to BMJ Publishing Group Ltd ("BMJ") its licensees and where the relevant Journal is co-owned by BMJ to the co-owners of the Journal, to publish the Work in this journal and any other BMJ products and to exploit all rights, as set out in our [licence](#).

The Submitting Author accepts and understands that any supply made under these terms is made by BMJ to the Submitting Author unless you are acting as an employee on behalf of your employer or a postgraduate student of an affiliated institution which is paying any applicable article publishing charge ("APC") for Open Access articles. Where the Submitting Author wishes to make the Work available on an Open Access basis (and intends to pay the relevant APC), the terms of reuse of such Open Access shall be governed by a Creative Commons licence – details of these licences and which [Creative Commons](#) licence will apply to this Work are set out in our licence referred to above.

Other than as permitted in any relevant BMJ Author's Self Archiving Policies, I confirm this Work has not been accepted for publication elsewhere, is not being considered for publication elsewhere and does not duplicate material already published. I confirm all authors consent to publication of this Work and authorise the granting of this licence.

1  
2  
3  
4 **CHANGES TO POST-DIAGNOSTIC DEMENTIA SUPPORT IN ENGLAND AND WALES**  
5  
6 **DURING THE COVID-19 PANDEMIC: A QUALITATIVE STUDY**

7 Alison Wheatley<sup>1</sup>, Marie Poole<sup>1</sup>, Louise Robinson<sup>1</sup>, on behalf of the PriDem study team

8  
9  
10 1 Population Health Sciences Institute, Faculty of Medical Sciences, Newcastle University, Newcastle  
11 upon Tyne, UK

12 Corresponding author:

13  
14 Alison Wheatley

15 [alison.wheatley@newcastle.ac.uk](mailto:alison.wheatley@newcastle.ac.uk)

16 Population Health Sciences Institute,  
17 Faculty of Medical Sciences,  
18 Newcastle University,  
19 Newcastle Biomedical Research Building,  
20 Campus for Ageing and Vitality,  
21 Newcastle upon Tyne, NE4 5PL, UK  
22 ORCID: 0000-0002-6051-0286

23  
24  
25  
26 **Word count:** 4549  
27  
28  
29  
30  
31  
32  
33  
34  
35  
36  
37  
38  
39  
40  
41  
42  
43  
44  
45  
46  
47  
48  
49  
50  
51  
52  
53  
54  
55  
56  
57  
58  
59  
60

## Abstract

**Objectives:** to explore the impact of COVID-19 on post-diagnostic dementia care and support provision in England and Wales

**Design:** qualitative research using semi-structured interviews, via video or telephone conferencing

**Setting:** services providing post-diagnostic support across health, social care and the third sector

**Participants:** 21 professionals previously recruited to an ongoing research programme on post-diagnostic dementia care (or colleagues, if unavailable)

**Results:** Key themes identified from the data were: immediate challenges caused by COVID-19; widespread shift to remote working; and effects of COVID-19 on future post-diagnostic support. Challenges included changing and sometimes conflicting guidelines; a lack of access to support; identifying and responding to emerging needs; the emotional impact of COVID-19; and balancing COVID risk with other risks such as deterioration. Some dementia services closed whilst others adapted and continued to provide support thus potentially widening existing inequalities. There were also some unintended positive outcomes, including improved cross-sector and multidisciplinary working between professionals.

**Conclusion:** Delivering post-diagnostic dementia support during COVID-19 required essential adaptations. While some changes were detrimental to service users, others were identified as potentially beneficial and highly likely to become the new 'norm', for example use of blended approaches, combining virtual and face-to-face work, thus allowing more flexible, integrated care. Our data has implications for policy and practice to improve the response to the lingering effects of COVID-19 as well as creating service provision that is more resilient to future pandemics or other periods of disruption.

**Keywords:** dementia, COVID-19, post-diagnostic support, qualitative research

### Strengths and limitations of the study

- This study formed part of a larger study of post-diagnostic support in England and Wales, allowing us to contextualise changes.
- Interviews were retrospective, capturing changes that had happened over time.
- Participants were geographically diverse and from a range of different health and third-sector services.
- Limitations include a relatively small sample size with limited social care input.
- Recruitment of new participants was constrained by services remaining closed or at reduced capacity during the recruitment period.

## BACKGROUND

Before the COVID-19 pandemic, one aim of global dementia policy was to improve post-diagnostic care and support.[1-5] Even prior to COVID-19, considerable geographical inequalities existed in post-diagnostic support in England and Wales.[6-8] COVID-19 disrupted many health and social care services, and diverting resources from non-COVID care resulted in referral and treatment backlogs,[9] including in dementia care.[10] Such disruption had a disproportionate effect on people living with dementia.[5, 10-12] The UK went through several 'lockdowns' to reduce the spread of COVID-19 with promotion of the use of personal protective equipment (PPE), social distancing, and restrictions on travel and mixing between households;[13] thus services for people living with dementia were forced to suspend or adapt provision. Many care homes, in which 70% of residents have dementia, reduced social activities and stopped visitor access.[10] People living with dementia were encouraged by government to 'shield' (i.e. remain in their homes) as members of a vulnerable group,[10] and there is evidence that COVID-19 mortality and morbidity disproportionately affected them.[11]

Several recent studies[14-17] investigated the impact of COVID-19 on people affected by dementia. They found that restrictions had negative psychological and emotional effects[14, 16, 17], as well as reportedly exacerbating dementia symptoms and speeding decline.[14-17] Studies of professionals providing dementia care in the UK and elsewhere[18-20] have reported challenges implementing COVID-19 restrictions,[18-20] adapting to new ways of working without necessary support and training,[19, 20] and balancing the wellbeing of professionals with provision of quality care.[18] While these studies provide important insights, no study to our knowledge has explored in-depth the experiences of dementia professionals from across disciplines and sectors. The aim of this paper is to explore a range of professionals' experiences of commissioning and providing post-diagnostic dementia support in England and Wales during the COVID-19 pandemic, with a specific focus on identifying challenges and solutions.

## METHODS

We used qualitative semi-structured interviews to explore views and experiences of key professionals as part of an ongoing research programme (PriDem) focused on improving post-diagnostic dementia care and support.[21] Methods were chosen for their utility in exploring experiences of professionals in relation to a specific phenomenon (i.e. the COVID-19 pandemic).

### Sample and setting

The sample comprised commissioners, managers, and frontline staff of services providing post-diagnostic support in England and Wales who had previously been recruited to the PriDem study before COVID-19[7, 22, 23], or a colleague if unavailable. The sample was purposive, and restricted by availability of professionals and the time-limited nature of the project.

### Data collection and analysis

Data were collected between March and May 2021 by AW (sociologist) and MP (health services researcher). Topic guides were informed by COVID-related subjects raised by task-group participants during PriDem intervention development. Topics covered included impacts on: services; staff; people living with dementia and carers; commissioning; and future provision. We aimed to minimise burden by making data collection as parsimonious as possible while still providing rich data, following COVID-19 principles set out by the British Geriatrics Society.[24] Interviews averaged 34 minutes, and were conducted using telephone or video conferencing, sometimes jointly with other

professionals, according to participant preference. Interviews were audio recorded, professionally transcribed, and checked and pseudonymised prior to analysis (AW or MP).

Data were analysed using framework analysis,<sup>[25]</sup> facilitated by NVivo 12 software. Both researchers familiarised themselves with the data through listening to recordings, followed by reading and re-reading transcripts. Initial potential codes were then produced and refined through discussion to develop a coding frame. Ten percent of the transcripts were dual-coded (AW and MP), with agreement checked via NVivo coding comparison tools and discrepancies discussed and resolved. Remaining transcripts were single-coded and illustrative quotations identified for each code. A series of data workshops was held to compare findings and refine final interpretations (AW, MP and LR).

## Ethics

Approval was granted by NHS Research Ethics Committee Wales 3 (reference 18/WA/0349). Most participants provided written consent via email or post, with verbal consent sought before interview for those who had not returned consent forms. Participants are identified in this paper only via pseudonym.

## RESULTS

Eighteen interviews were conducted with 21 professionals: 6 commissioners, 8 service managers or team leads, and 7 frontline staff. Professionals worked in primary care (6), secondary care (9), joint health and social care (1), and third sector (5). Services included memory assessment services, community dementia teams, and specialist support services for black and minority ethnic (BAME) people and people with young onset dementia. Professional backgrounds of participants included GP, dementia specialist nurse, occupational therapist and dementia support worker. Three participants were from Wales and 18 from England.

Findings are organised into three themes, as shown in Table 1 and discussed in detail below.

Table 1: Themes and subthemes

| Theme                                                 | Subtheme                                    |
|-------------------------------------------------------|---------------------------------------------|
| Challenges for post-diagnostic support                | Changing and conflicting guidelines         |
|                                                       | Access to support                           |
|                                                       | Emotional and physical impact of COVID-19   |
|                                                       | New and heightened risk                     |
| Immediate response to challenges                      | Adapting practice to new and emerging needs |
|                                                       | Additional support for staff                |
|                                                       | Use of technology and remote working        |
| Effects of COVID-19 on future post-diagnostic support | Impact on funding and commissioning         |
|                                                       | Unmet need                                  |
|                                                       | Retaining changes made during COVID-19      |

### Challenges for post-diagnostic support

A number of challenges for post-diagnostic emerged during COVID-19, and services were forced to come up with creative ways of overcoming them, involving a high degree of trial and error.

#### Changing and conflicting guidelines

Understanding and responding to guidelines from various sources, including national and devolved government, local councils and NHS organisations, could be challenging. Inconsistencies created

particular difficulties for services involving workers from more than one sector. Staff described this period as 'stop-start' due to ongoing uncertainty.

Moreover, guidelines were not always person-centred or appropriate for people living with dementia. Language such as 'lockdowns' and 'social distancing' led to some social support services being unnecessarily cautious:

*I've had to say, "you are health and care and support. I know it's got the feel of a social gathering and that's why it's nice for people because it feels like a social gathering, but this is doing people good" (S016, joint commissioner)*

PPE could be confusing or frightening for people living with dementia, as well as hindering communication through hiding mouth movement and facial expressions. Some service users preferred remote contact to visits with full PPE:

*[Carers] said, "There's no point you coming with your PPE because [the person living with dementia] finds it really stressful." I've tried the see-through ones [facemasks], but you have to still wear your visor. [...] you've got your aprons and you've got your gloves, all that, and it's still, you end up still traumatising the patient (S057, community dementia support team)*

Some professionals therefore suggested that policies mandating PPE for face-to-face visits should have been flexible, especially where physical contact was unnecessary.

### Access to support

The reduced availability of staff, either due to furloughs, redeployment to COVID-19 care, or their status as clinically vulnerable, additionally affected whether services could operate. While some dementia services were able to adapt to guidelines and resource challenges, others were forced to close entirely at various times, including some memory assessment services. Services providing group social interaction and meaningful activity were particularly vulnerable to closure due to a lack of space to implement social distancing. Closures placed extra pressure on other services, including crises arising from reduced social contact and support networks; problems providing support where people with suspected dementia had not yet received a diagnosis; reduced access to support and advice for staff in other sectors; and inappropriate referrals to dementia services:

*[The dementia service has] had two referrals for hands [...] it's [an] OT [occupation therapy] problem to look at the contracture, and a nursing problem to look at the [hand] hygiene. But it's all come to us, hasn't it, and it's strange [...] how we've become seen as a Jack of All Trades (S056, community dementia support team)*

Transitions for people living with dementia living in the community needing admission to hospital or a care home, either permanently or for respite, were also affected. Reduced or no visiting to relatives living in care homes was identified by professionals as a major impact of COVID-19.

### Emotional and physical impact of COVID-19

Working in dementia care during COVID-19 affected professionals both emotionally and physically. Many staff worked longer hours than usual and some felt that they were approaching 'burnout'. In addition to personal experiences with COVID-19, facing more patient deaths than usual and



addressing the heightened emotional support needs of service users was challenging. Staff also reported feelings of helplessness when balancing precaution with action:

*[...] historically we would have just said, "Right, this person needs an emergency visit," we go out and we try to put as much in place as we can. However, if that person has got COVID then we cannot just go rushing out because then we are putting all our colleagues and other people at risk. So we feel quite disabled.*  
(S603, dementia support worker)

Working from home reduced professionals' access to informal peer support such as debriefs with colleagues following emotional telephone consultations. Moreover, lack of travel time between 'visits' either at home or on site reduced opportunities for reflexive practice and lead to increased pressure:

*[...] because we're continuously on the phones, there's no breaks [...] we've increased our contacts, but I think at the detriment of our health and wellbeing because we don't have any time to just offload. Breathe, get coffee and actually offload* (S057, community dementia support team)

### New and heightened risk

Managing risk was challenging for services and service users alike. Recognising and treating the symptoms of COVID-19 in people living with dementia were identified as specific areas for improvement. However, while managing COVID-19 was important, it was also necessary to balance other heightened risks for people living with dementia, including increased isolation and worsening symptoms. Professionals reported that many families had paused in-home services, such as paid home care, because of COVID-19 risk. One GP practice had put every patient with dementia on the NHS 'shielding list', which allowed them to gain priority access to some designated services:

*[...] we made a decision in the practice a year ago, to put all of our patients with dementia on the shielding list. The rationale being that, yes, they were more vulnerable, but also, it would be easier for them to access the support services that were available* (S043, GP commissioner)

However, others reported that defining people living with dementia as vulnerable led to over-cautiousness with some missing out on beneficial interventions such as outside exercising, arguing that providing better information could have reduced anxiety and encouraged engagement in activities.

### Immediate response to challenges

While responses varied widely, there were several examples of good practice.

#### Adapting practice to new and emerging needs

Innovative adaptations that allowed services to remain open included social distancing indoors, meeting outdoors, and reallocating existing resources, such as assigning volunteers to telephone helplines or one-to-one support rather than group support activities:

*[We had] peer supporters phoning up people living with dementia and their carers and saying, "Can we have a cup of tea outside your door?" You know, "Can we meet to just have a check in, see how things are, what you need support with, how we can help you in terms of caring?" [...] because people were worried and*

1  
2  
3 *frightened about catching coronavirus, and a lot of the carers were struggling to*  
4 *come out of the house (S037, NHS commissioner)*  
5

6 Service users' needs were often different than usual, including increased emotional support needs  
7 due to isolation, and varied across the different phases of lockdown, requiring reactivity in  
8 everyday practice. In some services, pre-booked appointments were replaced with telephone  
9 hotlines, often focusing on hospital admissions avoidance and crisis management. However, this  
10 type of working was more challenging for staff in terms of managing time and workload. Several  
11 services combined reactive approaches with proactive welfare checks for those with the highest  
12 levels of need. Reviewing and triaging caseloads at the beginning of lockdown enabled services to  
13 prioritise, and identify matters that could have been missed:  
14  
15

16  
17 *We rated them [service users] either red, amber or green, from just our*  
18 *knowledge of their social set up, their care needs and their severity of symptoms*  
19 *[...] you'd stumble across that they hadn't been put on a list for getting groceries,*  
20 *they didn't have anyone who could do shopping for them, so we'd kind of have to*  
21 *try and get that sorted and signposted one of the charities or someone who could*  
22 *help. We came across a couple of safeguarding [elder abuse and neglect] things*  
23 *(S046, GP)*  
24  
25

#### 26 Additional support for staff

27 Some managers put additional support in place for staff, including formal check-ins, regular breaks,  
28 and access to counselling, with some prioritising managing staff wellbeing over other duties:  
29

30  
31 *I have very much stepped back from patient care and I have just been here to*  
32 *support the staff, because the staff and just needing that extra support like I have*  
33 *never known in my career, and I have managed staff for a long time (S036,*  
34 *memory service manager)*  
35

36 This additional support was valued by frontline professionals.

37  
38 Cross-sector advice and support for other professionals were also important. One memory service  
39 with a well-established care home liaison team adopted a proactive approach to support care home  
40 staff:  
41

42  
43 *[...] our care home liaison staff were setting up regular touch-bases with the care*  
44 *home teams, in many ways kind of offering a bit of long-arm supervision. They*  
45 *were troubleshooting over the phone, but often times it was just care teams*  
46 *phoning up just to say, "Can we talk through stuff?" wanting someone outside*  
47 *the building to understand what their pressures were and what was going on for*  
48 *them (S214, memory service manager)*  
49

#### 50 Use of technology and remote working

51 Perhaps the most widespread solution to COVID-19 restrictions was technology and remote working.  
52 The first response was frequently to implement additional telephone support, as telephones were  
53 considered more accessible for people living with dementia. However, web-based solutions were  
54 also implemented. Diverse services including case management, diagnostic services and support  
55 groups were able to continue remotely, which had benefits and drawbacks for both service users  
56 and providers.  
57  
58  
59  
60

### *Benefits and drawbacks of remote consultation for service users*

Potential benefits to remote consultations included increased convenience, comfort and control for people living with dementia and carers:

*A carer yesterday said to me she finds it easier to engage, expressing herself about quite difficult and emotional issues, on the screen [...] If you're not finding it helpful or you want to disengage, you're not going to be faced with social awkwardness thinking "how do I extract myself now and leave?" You can make an excuse and log off (S034, team lead, young onset dementia service)*

Virtual methods allowed services to extend their reach, enabling the inclusion of carers who lived at distance or had other commitments that reduced their capacity to attend face-to-face meetings, as well as more service users than they ordinarily would meet due to reductions in travel time:

*[...] you might be able to make 8 to 10 calls during the day, whereas visits, you might only do 3 to 4 visits during the day. So, it's definitely being able to reach out more responsively, I would say, and quicker to people, and having access, which has been a positive (S015, dementia specialist nurse)*

Several services that usually provided home visits implemented a 'triage' process to assess which visits were in service users' best interests and should take place and which should be carried out remotely. Some elements of support, including cognitive assessments, were difficult to achieve successfully remotely, and others, such as diagnosis disclosure or planning for end of life, could be unsuitable because of their emotional nature, particularly for people living alone. Remote support also reduced access to non-verbal cues; professionals felt they did not have the 'full picture' of what was going on in the life of the person, despite being able to see them on the screen:

*[...] you don't always pick up the subtleties of what somebody is perhaps not telling you, or the environment that they are living in. If you can't see all of that you only get part of a picture (S049, dementia specialist nurse)*

There were also concerns around accessibility, especially for those who did not have a carer to help them. Potential problems with telephones included reluctance to answer unknown numbers and lack of assistive technology. Dementia symptoms, such as difficulties with memory and concentration, compounded by loss of eye-contact and body language, could make remote consultations and meetings confusing and tiring. Some professionals were therefore concerned that people living with dementia's voices were marginalised when interacting remotely.

Some families were supported by community-based initiatives which provided assistive technology for telephone calls, loaned hardware such as computer tablets, and/or supported users to download apps and connect to meetings; areas where such initiatives had already been in place pre-pandemic were better placed to adapt. Other types of support included telephone coaching in advance of sessions and using a static joining link to reduce complexity. Professionals highlighted that many people have also gained confidence and technological skills in informal ways during lockdown:

*[...] whereas Nan would have been reluctant to have a video call ever, [now] because that's the only way she can see her grandchildren, she's trying it and actually become more confident with it. So, when you are offering these interventions in different ways, people are much more open to it and the confidence is building (S054, memory service manager)*

### *Benefits and drawbacks of remote working for staff*

Virtual solutions adapted rapidly along with changing needs and guidelines. Different videoconferencing applications were considered more appropriate for different types of interactions, for reasons of accessibility, usability, and security, requiring staff to become proficient in several platforms. There were additional logistical challenges for services that had not previously had infrastructure in place, for example, obtaining computers, setting up remote workspaces, or problems arising from the need to use personal equipment for work.

In addition to patient-facing work, professionals used videoconferencing to support cross-service and -sector working, facilitating multidisciplinary team meetings, care home ward rounds, and networking and training events:

*These meetings were not happening before, or they used to happen once a month in a boardroom somewhere. If you trudged over there and spent hours finding parking before you got into the meeting, all that kind of nonsense which sort of beat the purpose. That sort of thing [meeting] is happening far more now. I am far more aware of who my counterparts in local authority are. So, if I need to raise questions or get answers I know where to go (S059, GP commissioner)*

However, working remotely could reduce informal networking opportunities.

### **Effects of COVID-19 on future post-diagnostic support**

Participants thought the negative effects of COVID-19 on dementia care were likely to be ongoing and long-lasting. However, many professionals also felt there were positive changes which could be integrated into future practice.

#### **Impact on funding and commissioning**

COVID-19 had a financial effect on dementia services; NHS funds had been diverted to efforts to manage COVID-19 and local authority and third-sector funds were also negatively affected. However, some additional funding streams became available, such as those to support digital participation or services set up to support people during COVID-19. Commissioners thought that policy decisions, such as priority being given to COVID-19 recovery and vaccine programmes, may have ongoing implications for post-diagnostic support:

*I think the changing politics and the changing environment within the CCG (NHS Clinical Commissioning Group) and new prime minister and all the rest of it, new priorities, has made a difference [...] I've lost people who were up to speed with what I was doing. I feel as I'm having to start all over again (S043, GP commissioner)*

#### **Unmet need**

With the reduction in service provision, professionals expressed concern about unmet dementia support needs. Those attending services once they reopened were found to be more advanced in their dementia due to a combination of delays in diagnosis, lack of proactive support, and the effects of isolation:

*my bigger worry is, is just how much unmet need is going to start to emerge as we're coming out of lockdown [...] we're starting to see now people presenting at much more crisis points because they've been kind of rumbling along for a long*

*time without seeking help, so I suspect it's actually going to be much worse in the coming year (S050, GP commissioner)*

Where resource for dementia services had been reprioritised to COVID-19 responses, there were concerns that this had not yet been assigned back to dementia services. There was also concern over the lasting effects of COVID-19 and Long-COVID, particularly exacerbation of symptoms in people with existing dementia, or potential new forms of memory loss. As these issues were emerging and not fully understood, this was an example of the need for adaptability and responsiveness to ongoing change during COVID-19.

### Retaining changes made during COVID-19

Several professionals reported that COVID-19 had acted as a catalyst for innovation and changes in attitudes. Barriers such as reluctance to provide remote services were reduced, enabling changes that had previously been considered impossible:

*I think there were some very – what's the word? – some sort of sacred cows [...] A bit of, "We can't possibly do it in that way," and then, suddenly, they had to. Then, suddenly, they think, "Actually, that has worked quite well." So, in some ways, it has been a bit of an engine for innovation (S708, NHS commissioner)*

Professionals from all sectors identified changes they wished to retain, particularly 'blended' approaches to remote working that would enable users to choose in-person or virtual meetings:

*If people [in the group] still want to keep music sessions online and meet [face-to-face] on Thursdays, because our music sessions are on Mondays, then we will probably just keep those virtual. But depending on what the client is going to want, really. I can't decide on that, so it will be up to them (S047, BAME dementia service manager)*

While some staff expressed concerns and hesitancy around blended working, these were mainly concerns around online provision and suitability of platforms. Other changes that service managers felt could be taken forward included the idea of triaging their caseloads to identify needs and plan future contacts.

## DISCUSSION

This paper reports an in-depth qualitative study to describe the experiences of a wide range of professionals – service commissioners, managers and frontline staff – providing post-diagnostic dementia care in England and Wales during COVID-19. A number of challenges arose, necessitating adaptations to services including reductions in face-to-face work and widespread adoption of technology. Many of these changes were refined through 'trial and error', with services required to be creative and resourceful. While some changes were detrimental to service users, others were potentially beneficial, with staff feeling these may become the 'new norm'. Chief among these was a blended approach involving both remote and face-to-face work, allowing flexible, convenient and tailored care, with improved choice and enhanced opportunities for carer involvement. Additional benefits to services and staff included improved professional development opportunities and better integration between services and sectors. Other examples of good practice included triaging caseloads and attending to professionals' emotional and physical support needs.

The challenges identified were consistent with other studies of professionals from different

1  
2  
3 contexts, including ambiguity around guidelines,[19, 20] the difficulty of balancing COVID-19 risk and  
4 restrictions with good quality care,[18, 19] and the emotional impact of COVID-19 on  
5 professionals.[18, 19] However, while some of the challenges we identified were unique to COVID-  
6 19, others were exacerbations of existing barriers to good post-diagnostic support, i.e. poorly  
7 managed cross-sector working and care transitions, inequalities in access to specialist support and  
8 limited anticipation and planning for future needs.[7] Services where existing challenges had been  
9 addressed pre-COVID experienced fewer disruptions. Ongoing challenges included unmet need in  
10 people living with dementia;[26] participants expected that these effects would be felt for many  
11 months to come, even once restrictions had been lifted. This is congruent with other research  
12 suggesting that COVID-19 and resulting isolation had both increased emotional support needs[14,  
13 16, 17] and worsened dementia symptoms[14-17].

14  
15  
16  
17  
18 Our results add to the evidence that older people and many people living with dementia can use  
19 technology,[27, 28] as improvements in the ability and confidence of both staff and service users in  
20 the use of technology is a potential ongoing effect of the response to COVID-19. Consistent with the  
21 findings of a recent review,[29] facilitators for virtual working included support from a carer and/or  
22 group organiser and accessibility of technology. However, professionals identified some specific  
23 challenges to using technology with some service users, echoing findings from people living with  
24 dementia and carers.[14] A blended approach, rather than a wholesale shift to remote working, was  
25 therefore seen as the most likely result for future post-diagnostic support.[19] Blended working  
26 would enable services to work more flexibly and responsively to the needs of service users and  
27 provide opportunities for more people to engage; however, the risk of marginalising the voices of  
28 people living with dementia should be considered when deciding which approach is suitable and  
29 acceptable to them, especially where there are conflicting preferences between people living with  
30 dementia and carers. In order to facilitate blended approaches and help mitigate remaining  
31 challenges, continuing training in digital literacy should be incorporated into existing  
32 recommendations about education and support for people living with dementia and carers,[2] as  
33 well as the development of dementia-friendly approaches to technology.[28]

### 34 **Strengths and limitations**

35 One strength of this study was that it formed part of a larger study of post-diagnostic support in  
36 England and Wales, allowing us to contextualise changes. Interviews were retrospective, capturing  
37 changes that had happened over time. Participants were geographically diverse and from a range of  
38 different health and third-sector services. Limitations include a relatively small sample size with  
39 limited social care input. However, this reflects the small number of social care services included in  
40 the sample from the original study;[22] recruitment of new participants was constrained by services  
41 remaining closed or at reduced capacity during the recruitment period.

### 42 **Implications for practice and policy**

43 Our data demonstrate that positive lessons can be learned to improve the response to the lingering  
44 effects of COVID-19 and create service provision that is more resilient to future pandemics or other  
45 periods of disruption. Firstly, addressing existing challenges to post-diagnostic support, such  
46 as integration between services and sectors, could help services and professionals better cope with  
47 crises and reduce inequalities of provision. Secondly, services which continued to function during  
48 COVID-19 learned to manage persistent uncertainty by generating and embracing creative solutions,  
49 including rapid uptake of new technologies, leading to benefits for both service providers and users.

1  
2  
3 Better support and training are still needed to enable professionals, people living with dementia and  
4 carers to make best use of technology within usual care; the increased uptake of remote working in  
5 this period has prepared the groundwork for blended working approaches to become the 'new  
6 norm', although it is important to ensure that this is appropriate for people living with dementia.  
7 Finally, it is vital that future pandemic policy and healthcare action plans adopt a more person-  
8 centred and flexible approach to risk management for subgroups of the population like people living  
9 with dementia where the risks of COVID-19 infection should be balanced with other risks such as  
10 isolation, as with other aspects of dementia care and support.  
11  
12  
13

## 14 **ACKNOWLEDGEMENTS**

15  
16 Administrative support was provided by Angela Mattison. We thank all participants for their support  
17 and involvement in the study. The PriDem study team is led by Professor Dame Louise Robinson  
18 (Newcastle University) and also includes Louise Allan (University of Exeter), Claire Bamford  
19 (Newcastle University), Sube Banerjee (University of Plymouth), Greta Brunskill (Newcastle  
20 University), Alistair Burns (NHS England and NHS Improvement), Sophie Dimitriadis (International  
21 Longevity Centre), Karen Harrison Denning (Dementia UK), Sarah Griffiths (University College London),  
22 Derek King (London School of Economics), Martin Knapp (London School of Economics), Doug Lewins  
23 (PPI co-applicant), Jill Manthorpe (King's College London), Greta Rait (University College London),  
24 Emily Spencer (University College London), Sue Tucker (PPI co-applicant), Kate Walters (University  
25 College London), Jane Wilcock (University College London) and Raphael Wittenberg (London School  
26 of Economics). A conference abstract related to this work was previously published.[30]  
27  
28  
29

## 30 **FUNDING**

31  
32 This work was supported by funding from Alzheimer's Society Centre of Excellence grant number  
33 331; the funder played no role in data collection, interpretation or reporting.  
34  
35

## 36 **COMPETING INTERESTS**

37  
38 The authors declare they have no competing interests.  
39

## 40 **AUTHOR CONTRIBUTIONS**

41  
42 AW, MP and LR conceived and designed the study and drafted the manuscript. AW and MP collected  
43 and analysed the qualitative data. Members of the PriDem study team revised and approved the  
44 final manuscript.  
45

## 46 **DATA SHARING STATEMENT**

47  
48 Qualitative dataset available upon reasonable request from data.ncl: [DOI pending]  
49

## 50 **PATIENT AND PUBLIC INVOLVEMENT STATEMENT**

51  
52 A multi-stakeholder Dementia Care Community (DCC) group was established as part of the wider  
53 PriDem programme to inform all stages of the research, involving people with dementia, their family  
54 members, and health and social care professionals from a range of organisations. The PriDem study  
55 project team includes two PPI co-applicants (DL and ST) who were involved in the management of  
56 the programme.  
57  
58  
59  
60

## REFERENCES

1. Alzheimer's Disease International. World Alzheimer Report 2016. Improving healthcare for people with dementia London: Alzheimer's Disease International; 2016 [Available from: <https://www.alz.co.uk/research/world-report-2016>].
2. National Institute for Health and Care Excellence. Dementia: assessment, management and support for people living with dementia and their carers (NG97). 2018 20 June. Contract No.: NG97.
3. NHS England. The Well Pathway for Dementia 2016 [Available from: <https://www.england.nhs.uk/mentalhealth/wp-content/uploads/sites/29/2016/03/dementia-well-pathway.pdf>].
4. World Health Organisation. Global action plan on the public health response to dementia 2017-2025 Geneva: World Health Organisation; 2017 [Available from: <https://apps.who.int/iris/bitstream/handle/10665/259615/9789241513487-eng.pdf?sequence=1>].
5. Alzheimer's Disease International. From Plan to Impact IV: Progress towards targets of the WHO Global action plan on dementia. London: Alzheimer's Disease International; 2021.
6. Frost R, Walters K, Wilcock J, et al. Mapping post-diagnostic dementia care in England: an e-survey. *Journal of Integrated Care*. 2020.
7. Wheatley A, Bamford C, Brunskill G, et al. Implementing post-diagnostic support for people living with dementia in England: a qualitative study of barriers and strategies used to address these in practice. *Age and Ageing*. 2021.
8. Alzheimer's Society. From diagnosis to end of life: The lived experiences of dementia care and support. Alzheimer's Society and the Peter Sowerby Foundation; 2020 October 2020.
9. British Medical Association. The hidden impact of COVID-19 on patient care in the NHS in England London: British Medical Association; 2020 [Available from: [https://www.bma.org.uk/media/2840/the-hidden-impact-of-covid\\_web-pdf.pdf](https://www.bma.org.uk/media/2840/the-hidden-impact-of-covid_web-pdf.pdf)].
10. Alzheimer's Society. Worst hit: dementia during coronavirus. Alzheimer's Society; 2020 September 2020.
11. Burns A, Howard R. COVID-19 and dementia: A deadly combination. *Int J Geriatr Psychiatry*. 2021;36(7):1120-1.
12. Liu KY, Howard R, Banerjee S, et al. Dementia wellbeing and COVID-19: Review and expert consensus on current research and knowledge gaps. *Int J Geriatr Psychiatry*. 2021.
13. Institute for Government. Timeline of UK coronavirus lockdowns, March 2020 to March 2021 London: IfG; 2021 [Available from: <https://www.instituteforgovernment.org.uk/sites/default/files/timeline-lockdown-web.pdf>].
14. Tuijt R, Frost R, Wilcock J, et al. Life under lockdown and social restrictions - the experiences of people living with dementia and their carers during the COVID-19 pandemic in England. *BMC Geriatrics*. 2021;21(1).
15. Giebel C, Cannon J, Hanna K, et al. Impact of COVID-19 related social support service closures on people with dementia and unpaid carers: a qualitative study. *Aging Ment Health*. 2020:1-8.
16. Talbot CV, Briggs P. 'Getting back to normality seems as big of a step as going into lockdown': the impact of the COVID-19 pandemic on people with early to middle stage dementia. *Age Ageing*. 2021;50(3):657-63.
17. Tsapanou A, Papatranta fyllou JD, Yiannopoulou K, et al. The impact of COVID-19 pandemic on people with mild cognitive impairment/dementia and on their caregivers. *Int J Geriatr Psychiatry*. 2021;36(4):583-7.
18. Lim RHM, Shalhoub R, Sridharan BK. The experiences of the community pharmacy team in supporting people with dementia and family carers with medication management during the COVID-19 pandemic. *Research in Social and Administrative Pharmacy*. 2021;17(1):1825-31.
19. Bhome R, Huntley J, Dalton-Locke C, et al. Impact of the COVID-19 pandemic on older adults mental health services: A mixed methods study. *International Journal of Geriatric Psychiatry*. 2021.



- 1  
2  
3 20. Banerjee D, Vajawat B, Varshney P, et al. Perceptions, Experiences, and Challenges of  
4 Physicians Involved in Dementia Care During the COVID-19 Lockdown in India: A Qualitative Study.  
5 *Frontiers in Psychiatry*. 2021;11.  
6  
7 21. PriDem study project team. Primary care-led post diagnostic Dementia Care (PriDem):  
8 developing evidence-based, person-centred sustainable models for future care 2021 [Available from:  
9 <https://research.ncl.ac.uk/pridem/>.  
10  
11 22. Wheatley A, Bamford C, Brunskill G, et al. Task-shifted approaches to postdiagnostic  
12 dementia support: a qualitative study exploring professional views and experiences. *BMJ Open*.  
13 2020;10:e040348.  
14  
15 23. Bamford C, Wheatley A, Brunskill G, et al. Key components of post-diagnostic support for  
16 people with dementia and their carers: a qualitative study *PloS One*. In press.  
17  
18 24. British Geriatrics Society. BGS statement on research for older people during the COVID-19  
19 pandemic 2020 [Available from: [https://www.bgs.org.uk/resources/covid-19-bgs-statement-on-](https://www.bgs.org.uk/resources/covid-19-bgs-statement-on-research-for-older-people-during-the-covid-19-pandemic)  
20 [research-for-older-people-during-the-covid-19-pandemic](https://www.bgs.org.uk/resources/covid-19-bgs-statement-on-research-for-older-people-during-the-covid-19-pandemic).  
21  
22 25. Gale NK, Heath G, Cameron E, et al. Using the framework method for the analysis of  
23 qualitative data in multi-disciplinary health research. *BMC Medical Research Methodology*.  
24 2013;13(117):1-8.  
25  
26 26. Miralles O, Sanchez-Rodriguez D, Marco E, et al. Unmet needs, health policies, and actions  
27 during the COVID-19 pandemic: a report from six European countries. *Eur Geriatr Med*.  
28 2021;12(1):193-204.  
29  
30 27. Poole M, Davis N, Robinson L. Massive Open Online Courses: enhancing caregiver education  
31 and support about dementia care towards and at end of life. *Age and Ageing*. 2019;49(2):171-4.  
32  
33 28. Di Lorito C, Duff C, Rogers C, et al. Tele-Rehabilitation for People with Dementia during the  
34 COVID-19 Pandemic: A Case-Study from England. *Int J Environ Res Public Health*. 2021;18(4).  
35  
36 29. Dowson B, Schneider J. Online singing groups for people with dementia: scoping review.  
37 *Public Health*. 2021;194:196-201.  
38  
39 30. Wheatley A, Poole M, Robinson L. 211 - Changes to post-diagnostic dementia support in  
40 England and Wales during the COVID-19 pandemic. *International Psychogeriatrics*. 2021;33(S1):13-.

## Standards for Reporting Qualitative Research (SRQR)\*

<http://www.equator-network.org/reporting-guidelines/srqr/>

Page/line no(s).

### Title and abstract

|                                                                                                                                                                                                                                                              |   |
|--------------------------------------------------------------------------------------------------------------------------------------------------------------------------------------------------------------------------------------------------------------|---|
| <p><b>Title</b> - Concise description of the nature and topic of the study Identifying the study as qualitative or indicating the approach (e.g., ethnography, grounded theory) or data collection methods (e.g., interview, focus group) is recommended</p> | 1 |
| <p><b>Abstract</b> - Summary of key elements of the study using the abstract format of the intended publication; typically includes background, purpose, methods, results, and conclusions</p>                                                               | 2 |

### Introduction

|                                                                                                                                                                     |   |
|---------------------------------------------------------------------------------------------------------------------------------------------------------------------|---|
| <p><b>Problem formulation</b> - Description and significance of the problem/phenomenon studied; review of relevant theory and empirical work; problem statement</p> | 3 |
| <p><b>Purpose or research question</b> - Purpose of the study and specific objectives or questions</p>                                                              | 3 |

### Methods

|                                                                                                                                                                                                                                                                                                                                                                                                             |   |
|-------------------------------------------------------------------------------------------------------------------------------------------------------------------------------------------------------------------------------------------------------------------------------------------------------------------------------------------------------------------------------------------------------------|---|
| <p><b>Qualitative approach and research paradigm</b> - Qualitative approach (e.g., ethnography, grounded theory, case study, phenomenology, narrative research) and guiding theory if appropriate; identifying the research paradigm (e.g., postpositivist, constructivist/ interpretivist) is also recommended; rationale**</p>                                                                            | 3 |
| <p><b>Researcher characteristics and reflexivity</b> - Researchers' characteristics that may influence the research, including personal attributes, qualifications/experience, relationship with participants, assumptions, and/or presuppositions; potential or actual interaction between researchers' characteristics and the research questions, approach, methods, results, and/or transferability</p> | 3 |
| <p><b>Context</b> - Setting/site and salient contextual factors; rationale**</p>                                                                                                                                                                                                                                                                                                                            | 3 |
| <p><b>Sampling strategy</b> - How and why research participants, documents, or events were selected; criteria for deciding when no further sampling was necessary (e.g., sampling saturation); rationale**</p>                                                                                                                                                                                              | 3 |
| <p><b>Ethical issues pertaining to human subjects</b> - Documentation of approval by an appropriate ethics review board and participant consent, or explanation for lack thereof; other confidentiality and data security issues</p>                                                                                                                                                                        | 4 |
| <p><b>Data collection methods</b> - Types of data collected; details of data collection procedures including (as appropriate) start and stop dates of data collection and analysis, iterative process, triangulation of sources/methods, and modification of procedures in response to evolving study findings; rationale**</p>                                                                             | 3 |

|                       |                                                                                                                                                                                                                                                       |     |
|-----------------------|-------------------------------------------------------------------------------------------------------------------------------------------------------------------------------------------------------------------------------------------------------|-----|
| 1<br>2<br>3<br>4<br>5 | <b>Data collection instruments and technologies</b> - Description of instruments (e.g., interview guides, questionnaires) and devices (e.g., audio recorders) used for data collection; if/how the instrument(s) changed over the course of the study | 3   |
| 6<br>7<br>8           | <b>Units of study</b> - Number and relevant characteristics of participants, documents, or events included in the study; level of participation (could be reported in results)                                                                        | 4   |
| 9<br>10<br>11<br>12   | <b>Data processing</b> - Methods for processing data prior to and during analysis, including transcription, data entry, data management and security, verification of data integrity, data coding, and anonymization/de-identification of excerpts    | 3-4 |
| 13<br>14<br>15<br>16  | <b>Data analysis</b> - Process by which inferences, themes, etc., were identified and developed, including the researchers involved in data analysis; usually references a specific paradigm or approach; rationale**                                 | 3-4 |
| 17<br>18<br>19<br>20  | <b>Techniques to enhance trustworthiness</b> - Techniques to enhance trustworthiness and credibility of data analysis (e.g., member checking, audit trail, triangulation); rationale**                                                                | 3-4 |

### Results/findings

|                      |                                                                                                                                                                                                   |              |
|----------------------|---------------------------------------------------------------------------------------------------------------------------------------------------------------------------------------------------|--------------|
| 23<br>24<br>25<br>26 | <b>Synthesis and interpretation</b> - Main findings (e.g., interpretations, inferences, and themes); might include development of a theory or model, or integration with prior research or theory | 3-4, Table 1 |
| 27<br>28<br>29       | <b>Links to empirical data</b> - Evidence (e.g., quotes, field notes, text excerpts, photographs) to substantiate analytic findings                                                               | 5-10         |

### Discussion

|                                        |                                                                                                                                                                                                                                                                                                                                                                                                             |       |
|----------------------------------------|-------------------------------------------------------------------------------------------------------------------------------------------------------------------------------------------------------------------------------------------------------------------------------------------------------------------------------------------------------------------------------------------------------------|-------|
| 32<br>33<br>34<br>35<br>36<br>37<br>38 | <b>Integration with prior work, implications, transferability, and contribution(s) to the field</b> - Short summary of main findings; explanation of how findings and conclusions connect to, support, elaborate on, or challenge conclusions of earlier scholarship; discussion of scope of application/generalizability; identification of unique contribution(s) to scholarship in a discipline or field | 10-11 |
| 39                                     | <b>Limitations</b> - Trustworthiness and limitations of findings                                                                                                                                                                                                                                                                                                                                            | 11    |

### Other

|                |                                                                                                                                               |    |
|----------------|-----------------------------------------------------------------------------------------------------------------------------------------------|----|
| 42<br>43<br>44 | <b>Conflicts of interest</b> - Potential sources of influence or perceived influence on study conduct and conclusions; how these were managed | 12 |
| 45<br>46       | <b>Funding</b> - Sources of funding and other support; role of funders in data collection, interpretation, and reporting                      | 12 |

\*The authors created the SRQR by searching the literature to identify guidelines, reporting standards, and critical appraisal criteria for qualitative research; reviewing the reference lists of retrieved sources; and contacting experts to gain feedback. The SRQR aims to improve the transparency of all aspects of qualitative research by providing clear standards for reporting qualitative research.

1  
2  
3  
4  
5  
6  
7  
8  
9  
10  
11  
12  
13  
14  
15  
16  
17  
18  
19  
20  
21  
22  
23  
24  
25  
26  
27  
28  
29  
30  
31  
32  
33  
34  
35  
36  
37  
38  
39  
40  
41  
42  
43  
44  
45  
46  
47  
48  
49  
50  
51  
52  
53  
54  
55  
56  
57  
58  
59  
60

\*\*The rationale should briefly discuss the justification for choosing that theory, approach, method, or technique rather than other options available, the assumptions and limitations implicit in those choices, and how those choices influence study conclusions and transferability. As appropriate, the rationale for several items might be discussed together.

**Reference:**

O'Brien BC, Harris IB, Beckman TJ, Reed DA, Cook DA. **Standards for reporting qualitative research: a synthesis of recommendations.** *Academic Medicine*, Vol. 89, No. 9 / Sept 2014  
DOI: 10.1097/ACM.0000000000000388

For peer review only

# BMJ Open

## Changes to post-diagnostic dementia support in England and Wales during the COVID-19 pandemic: a qualitative study

|                                 |                                                                                                                                                                                                                                                                                                                                                                                                                               |
|---------------------------------|-------------------------------------------------------------------------------------------------------------------------------------------------------------------------------------------------------------------------------------------------------------------------------------------------------------------------------------------------------------------------------------------------------------------------------|
| Journal:                        | <i>BMJ Open</i>                                                                                                                                                                                                                                                                                                                                                                                                               |
| Manuscript ID                   | bmjopen-2021-059437.R1                                                                                                                                                                                                                                                                                                                                                                                                        |
| Article Type:                   | Original research                                                                                                                                                                                                                                                                                                                                                                                                             |
| Date Submitted by the Author:   | 20-Dec-2021                                                                                                                                                                                                                                                                                                                                                                                                                   |
| Complete List of Authors:       | Wheatley, Alison; Newcastle University Faculty of Medical Sciences, Population Health Sciences Institute<br>Poole, Marie; Newcastle University Faculty of Medical Sciences, Population Health Sciences Institute<br>Robinson, Louise; Newcastle University Faculty of Medical Sciences, Population Health Sciences Institute<br>(collaborator group), The PriDem study team; Newcastle University Faculty of Medical Sciences |
| <b>Primary Subject Heading</b>: | Qualitative research                                                                                                                                                                                                                                                                                                                                                                                                          |
| Secondary Subject Heading:      | Geriatric medicine, Neurology                                                                                                                                                                                                                                                                                                                                                                                                 |
| Keywords:                       | Dementia < NEUROLOGY, COVID-19, QUALITATIVE RESEARCH                                                                                                                                                                                                                                                                                                                                                                          |
|                                 |                                                                                                                                                                                                                                                                                                                                                                                                                               |

SCHOLARONE™  
Manuscripts



I, the Submitting Author has the right to grant and does grant on behalf of all authors of the Work (as defined in the below author licence), an exclusive licence and/or a non-exclusive licence for contributions from authors who are: i) UK Crown employees; ii) where BMJ has agreed a CC-BY licence shall apply, and/or iii) in accordance with the terms applicable for US Federal Government officers or employees acting as part of their official duties; on a worldwide, perpetual, irrevocable, royalty-free basis to BMJ Publishing Group Ltd ("BMJ") its licensees and where the relevant Journal is co-owned by BMJ to the co-owners of the Journal, to publish the Work in this journal and any other BMJ products and to exploit all rights, as set out in our [licence](#).

The Submitting Author accepts and understands that any supply made under these terms is made by BMJ to the Submitting Author unless you are acting as an employee on behalf of your employer or a postgraduate student of an affiliated institution which is paying any applicable article publishing charge ("APC") for Open Access articles. Where the Submitting Author wishes to make the Work available on an Open Access basis (and intends to pay the relevant APC), the terms of reuse of such Open Access shall be governed by a Creative Commons licence – details of these licences and which [Creative Commons](#) licence will apply to this Work are set out in our licence referred to above.

Other than as permitted in any relevant BMJ Author's Self Archiving Policies, I confirm this Work has not been accepted for publication elsewhere, is not being considered for publication elsewhere and does not duplicate material already published. I confirm all authors consent to publication of this Work and authorise the granting of this licence.

1  
2  
3  
4 **CHANGES TO POST-DIAGNOSTIC DEMENTIA SUPPORT IN ENGLAND AND WALES**  
5  
6 **DURING THE COVID-19 PANDEMIC: A QUALITATIVE STUDY**

7 Alison Wheatley<sup>1</sup>, Marie Poole<sup>1</sup>, Louise Robinson<sup>1</sup>, on behalf of the PriDem study team

8  
9 1 Population Health Sciences Institute, Faculty of Medical Sciences, Newcastle University, Newcastle  
10 upon Tyne, UK

11  
12 Corresponding author:

13  
14 Alison Wheatley

15 [alison.wheatley@newcastle.ac.uk](mailto:alison.wheatley@newcastle.ac.uk)

16 Population Health Sciences Institute,  
17 Faculty of Medical Sciences,  
18 Newcastle University,  
19 Newcastle Biomedical Research Building,  
20 Campus for Ageing and Vitality,  
21 Newcastle upon Tyne, NE4 5PL, UK  
22 ORCID: 0000-0002-6051-0286

23  
24  
25  
26 **Word count:** 5135  
27  
28  
29  
30  
31  
32  
33  
34  
35  
36  
37  
38  
39  
40  
41  
42  
43  
44  
45  
46  
47  
48  
49  
50  
51  
52  
53  
54  
55  
56  
57  
58  
59  
60

## Abstract

**Objectives:** to explore the impact of COVID-19 on post-diagnostic dementia care and support provision in England and Wales

**Design:** qualitative research using semi-structured interviews, via video or telephone conferencing

**Setting:** services providing post-diagnostic support across health, social care and the third sector

**Participants:** 21 professionals previously recruited to an ongoing research programme on post-diagnostic dementia care (or colleagues, if unavailable)

**Results:** Key themes identified from the data were: immediate challenges caused by COVID-19; widespread shift to remote working; and effects of COVID-19 on future post-diagnostic support. Challenges included changing and sometimes conflicting guidelines; a lack of access to support; identifying and responding to emerging needs; the emotional impact of COVID-19; and balancing COVID risk with other risks such as deterioration. Some dementia services closed whilst others adapted and continued to provide support thus potentially widening existing inequalities. There were also some unintended positive outcomes, including improved cross-sector and multidisciplinary working between professionals.

**Conclusion:** Delivering post-diagnostic dementia support during COVID-19 required essential adaptations. While some changes were detrimental to service users, others were identified as potentially beneficial and highly likely to become the new 'norm', for example use of blended approaches, combining virtual and face-to-face work, thus allowing more flexible, integrated care. Our data has implications for policy and practice to improve the response to the lingering effects of COVID-19 as well as creating service provision that is more resilient to future pandemics or other periods of disruption.

**Keywords:** dementia, COVID-19, post-diagnostic support, qualitative research

### Strengths and limitations of the study

- This study formed part of a larger study of post-diagnostic support in England and Wales, allowing us to contextualise changes.
- Interviews were retrospective, capturing changes that had happened over time.
- Participants were geographically diverse and from a range of different health and third-sector services.
- Limitations include a relatively small sample size with limited social care input.
- Recruitment of new participants was constrained by services remaining closed or at reduced capacity during the recruitment period.



## BACKGROUND

Before the COVID-19 pandemic, one aim of global dementia policy was to improve post-diagnostic care and support,[1-5] which is defined here as 'holistic, integrated continuing care in the context of declining function and increasing needs of family carers'. [1] Guidelines in England and Wales recommend all people living with dementia and their families are provided with support following diagnosis, including anti-dementia medications, cognitive stimulation therapy and carer psychoeducation.[2] An annual dementia review in primary care is also recommended.[6] However, even prior to COVID-19, considerable geographical inequalities existed in post-diagnostic support in England and Wales.[7-9] COVID-19 disrupted many health and social care services, and diverting resources from non-COVID care resulted in referral and treatment backlogs,[10] including in dementia care.[11] Such disruption had a disproportionate effect on people living with dementia.[5, 11-13] The UK went through several 'lockdowns' to reduce the spread of COVID-19 with promotion of the use of personal protective equipment (PPE), social distancing, and restrictions on travel and mixing between households;[14] thus services for people living with dementia were forced to suspend or adapt provision. Many care homes, in which 70% of residents have dementia, reduced social activities and stopped visitor access.[11] People living with dementia were encouraged by government to 'shield' (i.e. remain in their homes) as members of a vulnerable group,[11] and there is evidence that COVID-19 mortality and morbidity disproportionately affected them.[12]

Several recent studies[15-18] investigated the impact of COVID-19 on people affected by dementia. They found that restrictions had negative psychological and emotional effects,[15, 17, 18] as well as reportedly exacerbating dementia symptoms and speeding decline.[15-18] Studies of professionals providing dementia care in the UK and elsewhere[19-21] have reported challenges implementing COVID-19 restrictions,[19-21] adapting to new ways of working without necessary support and training,[20, 21] and balancing the wellbeing of professionals with provision of quality care.[19] While these studies provide important insights, no study to our knowledge has explored in-depth the experiences of dementia professionals from across disciplines and sectors. The aim of this paper is to explore a range of professionals' experiences of commissioning and providing post-diagnostic dementia support in England and Wales during the COVID-19 pandemic, with a specific focus on identifying challenges and solutions.

## METHODS

We used qualitative semi-structured interviews to explore views and experiences of key professionals as part of an ongoing research programme (PriDem).[22, 23] The overall aim of PriDem was to develop a new intervention to improve post-diagnostic dementia care and support through a process of literature reviews, qualitative studies with people with dementia, carers, and professionals, and co-design; the present study aimed to explore changes in services during COVID-19 and ensure that the developing PriDem intervention was suitable for a post-COVID-19 care landscape.

Methods for this study were chosen for their utility in exploring experiences of professionals in relation to a specific phenomenon (i.e. the COVID-19 pandemic) while making data collection as parsimonious as possible, following COVID-19 principles set out by the British Geriatrics Society.[24] This led us to take a pragmatic, 'codebook thematic analysis' approach[25] drawing on traditions of inductive qualitative research, enabling us to respond quickly to emerging issues while minimising burden on participants and still providing rich data.

## Sample and setting

Commissioners, managers, and frontline staff of services providing post-diagnostic support in England and Wales were eligible to take part. The sampling frame comprised professionals who had previously been recruited to the PriDem qualitative study before COVID-19,[8, 26, 27] and who had given permission for follow-up contact. If potential participants were unavailable, a colleague from the same service who had not previously been recruited to the PriDem study was eligible to take part in their place. The sample was purposive and aimed to achieve variety across sector (i.e. primary care, secondary care, social care and third sector), type of service or support provided, and geographical location. Sample size was restricted by availability of professionals and the time-limited nature of the project; a target sample size of 20 was selected to give scope to recruit participants with varied experiences while not placing undue burden on services.

Participants were approached for follow-up via email; contact details had either been retained with permission during the earlier phase of the PriDem study or, in the case of colleagues, were provided by potential participants who were unavailable. If there was no response after two contacts, participants were excluded.

## Data collection and analysis

Data were collected between February and May 2021 by two researchers (AW and MP). A semi-structured approach was chosen to provide prompts for discussion and continuity between interviews while also allowing flexibility to explore unanticipated issues raised by participants. Topic guides were used to facilitate this, informed by COVID-related subjects raised by task-group participants during PriDem intervention development. Topics covered included impacts on: services; staff; people living with dementia and carers; commissioning; and future provision (see supplementary file). Interviews averaged 34 minutes, and were conducted using telephone or video conferencing (Zoom or Teams), sometimes jointly with other professionals, according to participant preference. Interviews were audio recorded, professionally transcribed, and checked and pseudonymised prior to analysis (AW or MP).

Data management and analysis was assisted by NVivo 12 software. Data were analysed using framework analysis; this methodology was chosen for its utility in analysing semi-structured interview transcripts and facilitating comparison and contrast [28]. Both researchers familiarised themselves with the data through listening to recordings, followed by reading and re-reading transcripts. Initial potential codes were then produced and refined through discussion to develop a coding frame. Ten percent of the transcripts were dual-coded (AW and MP), with agreement checked via NVivo coding comparison tools and discrepancies discussed and resolved. Remaining transcripts were single-coded and illustrative quotations identified for each code. A series of data workshops was held to compare findings and refine final interpretations (AW, MP and LR).

## Reflexivity

Two team members (AW, MP) were health services researchers with backgrounds in sociology and ethnographic methods while one was a clinical academic and dementia specialist GP (LR); all team members had previous experience of carrying out dementia research and some also had personal experience of dementia caregiving. All team members were female. AW had previously interviewed some participants during earlier phases of the PriDem study, potentially improving rapport, while MP had not been involved in the earlier phases, allowing a new perspective on the data. Analysis was undertaken using an inductive approach designed to increase focus on the data and minimise

the influence of the researchers, while acknowledging the inherent subjectivity of qualitative data analysis.[25]

## Ethics

Approval was granted by NHS Research Ethics Committee Wales 3 (reference 18/WA/0349). Most participants provided written consent via email or post, with verbal consent sought before interview for those who had not returned consent forms. Participants are identified in this paper only via pseudonym.

## RESULTS

Eighteen interviews were conducted with 21 professionals: 6 commissioners, 8 service managers or team leads, and 7 frontline staff. Professionals worked in primary care (6), secondary care (9), joint health and social care (1), and third sector (5). Services included memory assessment services, community dementia teams, and specialist support services for black and minority ethnic (BAME) people and people with young onset dementia. Professional backgrounds of participants included GP, dementia specialist nurse, occupational therapist and dementia support worker. The geographical spread of the sample was across the following NHS regions: London (5); Midlands (1); North East and Yorkshire (5); North West (2); South East (3); South West (2); Wales (3).

Findings are organised into three themes, as shown in Table 1 and discussed in detail below.

Table 1: Themes and subthemes

| Theme                                                 | Subtheme                                    |
|-------------------------------------------------------|---------------------------------------------|
| Challenges for post-diagnostic support                | Changing and conflicting guidelines         |
|                                                       | Access to support                           |
|                                                       | Emotional and physical impact of COVID-19   |
|                                                       | New and heightened risk                     |
| Immediate response to challenges                      | Adapting practice to new and emerging needs |
|                                                       | Additional support for staff                |
|                                                       | Use of technology and remote working        |
| Effects of COVID-19 on future post-diagnostic support | Impact on funding and commissioning         |
|                                                       | Unmet need                                  |
|                                                       | Retaining changes made during COVID-19      |

### Challenges for post-diagnostic support

A number of challenges for post-diagnostic support emerged during COVID-19, and services were forced to come up with creative ways of overcoming them, involving a high degree of trial and error.

#### Changing and conflicting guidelines

Understanding and responding to guidelines from various sources, including national and devolved government, local councils and NHS organisations, could be challenging. Inconsistencies created particular difficulties for services involving workers from more than one sector. Staff described this period as 'stop-start' due to ongoing uncertainty.

Moreover, guidelines were not always person-centred or appropriate for people living with dementia. Language such as 'lockdowns' and 'social distancing' led to some social support services being unnecessarily cautious, as the boundaries of 'social activity' and 'support' could be ill-defined or misinterpreted:

1  
2  
3 *[Permission] for support groups of up to 15 people has been there for quite a*  
4 *while now, at least since the autumn, possibly longer ago than that. But a lot of*  
5 *things that our community groups put on for people with dementia, just have a*  
6 *very, sort of, human, social feel [...] [so group facilitators] tend to interpret what*  
7 *they can and can't do with those groups and activities according to the*  
8 *regulations that govern our social lives. [...] I think the fact that people talked*  
9 *about the second lockdown and the third lockdown doesn't help. [...] I've had to*  
10 *say, "you are health and care and support. I know it's got the feel of a social*  
11 *gathering and that's why it's nice for people because it feels like a social*  
12 *gathering, but this is doing people good" (S016, joint commissioner)*  
13  
14  
15

16 PPE could be confusing or frightening for people living with dementia, as well as hindering  
17 communication through hiding mouth movement and facial expressions. Some service users  
18 preferred remote contact to visits with full PPE:  
19

20 *[Carers] said, "There's no point you coming with your PPE because [the person*  
21 *living with dementia] finds it really stressful." I've tried the see-through ones*  
22 *[facemasks], but you have to still wear your visor. [...] you've got your aprons and*  
23 *you've got your gloves, all that, and it's still, you end up still traumatising the*  
24 *patient (S057, community dementia support team)*  
25  
26

27 Some professionals therefore suggested that policies mandating PPE for face-to-face visits should  
28 have been flexible, especially where physical contact was unnecessary.  
29

### 30 Access to support

31  
32 The reduced availability of staff, either due to furloughs, redeployment to COVID-19 care, or their  
33 status as clinically vulnerable, additionally affected whether services could operate. While some  
34 dementia services were able to adapt to guidelines and resource challenges, others were forced to  
35 close entirely at various times, including some memory assessment services. Services providing  
36 group social interaction and meaningful activity were particularly vulnerable to closure due to a lack  
37 of space to implement social distancing. Closures placed extra pressure on other services, including  
38 crises arising from reduced social contact and support networks; problems providing support where  
39 people with suspected dementia had not yet received a diagnosis; reduced access to support and  
40 advice for staff in other sectors; and inappropriate referrals to dementia services:  
41  
42

43 *[The dementia service has] had two referrals for hands [...] it's [an] OT*  
44 *[occupation therapy] problem to look at the contracture, and a nursing problem*  
45 *to look at the [hand] hygiene. But it's all come to us, hasn't it, and it's strange [...]*   
46 *how we've become seen as a Jack of All Trades (S056, community dementia*  
47 *support team)*  
48  
49

50 Transitions for people living with dementia living in the community needing admission to hospital or  
51 a care home, either permanently or for respite, were also affected. Reduced or no visiting to  
52 relatives living in care homes was identified by professionals as a major impact of COVID-19.  
53

### 54 Emotional and physical impact of COVID-19

55 Working in dementia care during COVID-19 affected professionals both emotionally and physically.  
56 Many staff worked longer hours than usual and some felt that they were approaching 'burnout'. In  
57 addition to personal experiences with COVID-19, facing more patient deaths than usual and  
58  
59  
60

addressing the heightened emotional support needs of service users was challenging. Staff also reported feelings of helplessness when balancing precaution with action:

*[...] historically we would have just said, "Right, this person needs an emergency visit," we go out and we try to put as much in place as we can. However, if that person has got COVID then we cannot just go rushing out because then we are putting all our colleagues and other people at risk. So we feel quite disabled.*  
(S603, dementia support worker)

Working from home reduced professionals' access to informal peer support such as debriefs with colleagues following emotional telephone consultations. Moreover, lack of travel time between 'visits' either at home or on site reduced opportunities for reflexive practice and lead to increased pressure:

*[...] because we're continuously on the phones, there's no breaks [...] we've increased our contacts, but I think at the detriment of our health and wellbeing because we don't have any time to just offload. Breathe, get coffee and actually offload* (S057, community dementia support team)

### New and heightened risk

Managing risk was challenging for services and service users alike. Recognising and treating the symptoms of COVID-19 in people living with dementia were identified as specific areas for improvement. However, while managing COVID-19 was important, it was also necessary to balance other heightened risks for people living with dementia, including increased isolation and worsening symptoms. Professionals reported that many families had paused in-home services, such as paid home care, because of COVID-19 risk. One GP practice had put every patient with dementia on the NHS 'shielding list', which allowed them to gain priority access to some designated services:

*[...] we made a decision in the practice a year ago, to put all of our patients with dementia on the shielding list. The rationale being that, yes, they were more vulnerable, but also, it would be easier for them to access the support services that were available* (S043, GP commissioner)

However, others reported that defining people living with dementia as vulnerable led to over-cautiousness with some missing out on beneficial interventions such as outside exercising, arguing that providing better information could have reduced anxiety and encouraged engagement in activities.

### Immediate response to challenges

While responses varied widely, there were several examples of good practice.

#### Adapting practice to new and emerging needs

Innovative adaptations that allowed services to remain open included social distancing indoors, meeting outdoors, and reallocating existing resources, such as assigning volunteers to telephone helplines or one-to-one support rather than group support activities:

*[We had] peer supporters phoning up people living with dementia and their carers and saying, "Can we have a cup of tea outside your door?" You know, "Can we meet to just have a check in, see how things are, what you need support with, how we can help you in terms of caring?" [...] because people were worried and*

1  
2  
3 *frightened about catching coronavirus, and a lot of the carers were struggling to*  
4 *come out of the house (S037, NHS commissioner)*  
5

6 Service users' needs were often different than usual, including increased emotional support needs  
7 due to isolation, and varied across the different phases of lockdown, requiring reactivity in  
8 everyday practice. In some services, pre-booked appointments were replaced with telephone  
9 hotlines, often focusing on hospital admissions avoidance and crisis management. However, this  
10 type of working was more challenging for staff in terms of managing time and workload. Several  
11 services combined reactive approaches with proactive welfare checks for those with the highest  
12 levels of need. Reviewing and triaging caseloads at the beginning of lockdown enabled services to  
13 prioritise, and identify matters that could have been missed:  
14  
15

16  
17 *We rated them [service users] either red, amber or green, from just our*  
18 *knowledge of their social set up, their care needs and their severity of symptoms*  
19 *[...] you'd stumble across that they hadn't been put on a list for getting groceries,*  
20 *they didn't have anyone who could do shopping for them, so we'd kind of have to*  
21 *try and get that sorted and signposted one of the charities or someone who could*  
22 *help. We came across a couple of safeguarding [elder abuse and neglect] things*  
23 *(S046, GP)*  
24  
25

#### 26 Additional support for staff

27 Some managers put additional support in place for staff, including formal check-ins, regular breaks,  
28 and access to counselling, with some prioritising managing staff wellbeing over other duties:  
29  
30

31 *I have very much stepped back from patient care and I have just been here to*  
32 *support the staff, because the staff and just needing that extra support like I have*  
33 *never known in my career, and I have managed staff for a long time (S036,*  
34 *memory service manager)*  
35

36 This additional support was valued by frontline professionals.

37  
38 Cross-sector advice and support for other professionals were also important. One memory service  
39 with a well-established care home liaison team adopted a proactive approach to support care home  
40 staff:  
41

42 *[...] our care home liaison staff were setting up regular touch-bases with the care*  
43 *home teams, in many ways kind of offering a bit of long-arm supervision. They*  
44 *were troubleshooting over the phone, but often times it was just care teams*  
45 *phoning up just to say, "Can we talk through stuff?" wanting someone outside*  
46 *the building to understand what their pressures were and what was going on for*  
47 *them (S214, memory service manager)*  
48  
49

#### 50 Use of technology and remote working

51 Perhaps the most widespread solution to COVID-19 restrictions was technology and remote working.  
52 The first response was frequently to implement additional telephone support, as people living with  
53 dementia were thought more likely to have access to telephones compared with computers, tablets,  
54 or smartphones. However, web-based solutions were also implemented. Diverse services including  
55 case management, diagnostic services and support groups were able to continue remotely, which  
56 had benefits and drawbacks for both service users and providers.  
57  
58  
59  
60

### *Benefits and drawbacks of remote consultation for service users*

Potential benefits to remote consultations included increased convenience, comfort and control for people living with dementia and carers:

*A carer yesterday said to me she finds it easier to engage, expressing herself about quite difficult and emotional issues, on the screen [...] If you're not finding it helpful or you want to disengage, you're not going to be faced with social awkwardness thinking "how do I extract myself now and leave?" You can make an excuse and log off (S034, team lead, young onset dementia service)*

Virtual methods allowed services to extend their reach, enabling the inclusion of carers who lived at distance or had other commitments that reduced their capacity to attend face-to-face meetings, as well as more service users than they ordinarily would meet due to reductions in travel time:

*[...] you might be able to make 8 to 10 calls during the day, whereas visits, you might only do 3 to 4 visits during the day. So, it's definitely being able to reach out more responsively, I would say, and quicker to people, and having access, which has been a positive (S015, dementia specialist nurse)*

Several services that usually provided home visits implemented a 'triage' process to assess which visits were in service users' best interests and should take place and which should be carried out remotely. Some elements of support, including cognitive assessments, were difficult to achieve successfully remotely, and others, such as diagnosis disclosure or planning for end of life, could be unsuitable because of their emotional nature, particularly for people living alone. Remote support also reduced access to non-verbal cues; professionals felt they did not have the 'full picture' of what was going on in the life of the person, despite being able to see them on the screen:

*[...] you don't always pick up the subtleties of what somebody is perhaps not telling you, or the environment that they are living in. If you can't see all of that you only get part of a picture (S049, dementia specialist nurse)*

There were also concerns around accessibility, especially for those who did not have a carer to help them. Potential problems with telephones included reluctance to answer unknown numbers and lack of assistive technology. Dementia symptoms, such as difficulties with memory and concentration, compounded by loss of contextual information, eye-contact and body language, could make remote consultations and meetings confusing and tiring. Some professionals were therefore concerned that people living with dementia's voices were marginalised when interacting remotely.

Some families were supported by community-based initiatives which provided assistive technology for telephone calls, loaned hardware such as computer tablets, and/or supported users to download apps and connect to meetings; areas where such initiatives had already been in place pre-pandemic were better placed to adapt. Other types of support included telephone coaching in advance of sessions and using a static joining link to reduce complexity. Professionals highlighted that many people have also gained confidence and technological skills in informal ways during lockdown:

*[...] whereas Nan would have been reluctant to have a video call ever, [now] because that's the only way she can see her grandchildren, she's trying it and actually become more confident with it. So, when you are offering these*

*interventions in different ways, people are much more open to it and the confidence is building (S054, memory service manager)*

### ***Benefits and drawbacks of remote working for staff***

Virtual solutions adapted rapidly along with changing needs and guidelines. Different videoconferencing applications were considered more appropriate for different types of interactions, for example Zoom for group activity, Attend Anywhere for individual consultations, and Teams for interaction between professionals; this was usually for reasons of accessibility, usability, and security, requiring staff to become proficient in several platforms. There were additional logistical challenges for services that had not previously had infrastructure in place, for example, obtaining computers, setting up remote workspaces, or problems arising from the need to use personal equipment for work.

In addition to patient-facing work, professionals used videoconferencing to support cross-service and -sector working, facilitating multidisciplinary team meetings, care home ward rounds, and networking and training events:

*These meetings were not happening before, or they used to happen once a month in a boardroom somewhere. If you trudged over there and spent hours finding parking before you got into the meeting, all that kind of nonsense which sort of beat the purpose. That sort of thing [meeting] is happening far more now. I am far more aware of who my counterparts in local authority are. So, if I need to raise questions or get answers I know where to go (S059, GP commissioner)*

However, working remotely could reduce informal networking opportunities.

### **Effects of COVID-19 on future post-diagnostic support**

Participants thought the negative effects of COVID-19 on dementia care were likely to be ongoing and long-lasting. However, many professionals also felt there were positive changes which could be integrated into future practice.

#### **Impact on funding and commissioning**

COVID-19 had a financial effect on dementia services; NHS funds had been diverted to efforts to manage COVID-19 and local authority and third-sector funds were also negatively affected. However, some additional funding streams became available, such as those to support digital participation or services set up to support people during COVID-19. Commissioners thought that policy decisions, such as priority being given to COVID-19 recovery and vaccine programmes, may have ongoing implications for post-diagnostic support:

*I think the changing politics and the changing environment within the CCG (NHS Clinical Commissioning Group) and new prime minister and all the rest of it, new priorities, has made a difference [...] I've lost people who were up to speed with what I was doing. I feel as I'm having to start all over again (S043, GP commissioner)*

#### **Unmet need**

With the reduction in service provision, professionals expressed concern about unmet dementia support needs. Those attending services once they reopened were found to be more advanced in their dementia due to a combination of delays in diagnosis, lack of proactive support, and the effects of isolation:



*my bigger worry is, is just how much unmet need is going to start to emerge as we're coming out of lockdown [...] we're starting to see now people presenting at much more crisis points because they've been kind of rumbling along for a long time without seeking help, so I suspect it's actually going to be much worse in the coming year (S050, GP commissioner)*

Where resource for dementia services had been reprioritised to COVID-19 responses, there were concerns that this had not yet been assigned back to dementia services. There was also concern over the lasting effects of COVID-19 and Long-COVID, particularly exacerbation of symptoms in people with existing dementia, or potential new forms of memory loss. As these issues were emerging and not fully understood, this was an example of the need for adaptability and responsiveness to ongoing change during COVID-19.

### Retaining changes made during COVID-19

Several professionals reported that COVID-19 had acted as a catalyst for innovation and changes in attitudes, including of some commissioners and providers of dementia support. Barriers such as reluctance to provide remote services were reduced, enabling changes that had previously been considered impossible:

*I think there were some very – what's the word? – some sort of sacred cows [among clinicians in dementia services] [...] A bit of, "We can't possibly do it in that way," and then, suddenly, they had to. Then, suddenly, they think, "Actually, that has worked quite well." So, in some ways, it has been a bit of an engine for innovation (S708, NHS commissioner)*

Professionals from all sectors identified changes they wished to retain, particularly 'blended' approaches to remote working that would enable people living with dementia and/or carers to choose in-person or virtual meetings:

*If people [in the group] still want to keep music sessions online and meet [face-to-face] on Thursdays, because our music sessions are on Mondays, then we will probably just keep those virtual. But depending on what the client is going to want, really. I can't decide on that, so it will be up to them (S047, BAME dementia service manager)*

While some staff expressed concerns and hesitancy around blended working, these were mainly concerns around online provision and suitability of platforms for providing dementia support. Other changes that service managers felt could be taken forward included the idea of triaging their caseloads to identify needs of people living with dementia and carers and plan future contacts.

## DISCUSSION

This paper reports an in-depth qualitative study to describe the experiences of a wide range of professionals – service commissioners, managers and frontline staff – providing post-diagnostic dementia care in England and Wales during COVID-19. A number of challenges arose, necessitating adaptations to services including reductions in face-to-face work and widespread adoption of technology. Many of these changes were refined through 'trial and error', with services required to be creative and resourceful. While some changes were detrimental to service users, others were potentially beneficial, with staff feeling these may become the 'new norm'. Chief among these was a blended approach involving both remote and face-to-face work, allowing flexible, convenient and

1  
2  
3 tailored care, with improved choice and enhanced opportunities for carer involvement. Additional  
4 benefits to services and staff included improved professional development opportunities and better  
5 integration between services and sectors. Other examples of good practice included triaging  
6 caseloads and attending to professionals' emotional and physical support needs.  
7  
8

9 The challenges identified were consistent with other studies of professionals from different  
10 contexts, including ambiguity around guidelines,[20, 21] the difficulty of balancing COVID-19 risk and  
11 restrictions with good quality care,[19, 20] and the emotional impact of COVID-19 on  
12 professionals.[19, 20] However, while some of the challenges we identified were unique to COVID-  
13 19, others were exacerbations of existing barriers to good post-diagnostic support, i.e. poorly  
14 managed cross-sector working and care transitions, inequalities in access to specialist support and  
15 limited anticipation and planning for future needs.[8] Services where existing challenges had been  
16 addressed pre-COVID experienced fewer disruptions. Ongoing challenges included unmet need in  
17 people living with dementia;[29] participants expected that these effects would be felt for many  
18 months to come, even once restrictions had been lifted. This is congruent with other research  
19 suggesting that COVID-19 and resulting isolation had both increased emotional support needs[15,  
20 17, 18] and worsened dementia symptoms[15-18].  
21  
22  
23  
24

25 Our results add to the evidence that older people and many people living with dementia can use  
26 technology,[30, 31] as improvements in the ability and confidence of both staff and service users in  
27 the use of technology is a potential ongoing effect of the response to COVID-19. Consistent with the  
28 findings of a recent review,[32] facilitators for virtual working included support from a carer and/or  
29 group organiser and accessibility of technology. However, professionals identified some specific  
30 challenges to using technology with some service users, echoing findings from people living with  
31 dementia and carers.[15] A blended approach, rather than a wholesale shift to remote working, was  
32 therefore seen as the most likely result for future post-diagnostic support.[20] Blended working  
33 would enable services to work more flexibly and responsively to the needs of service users and  
34 provide opportunities for more people to engage; however, the risk of marginalising the voices of  
35 people living with dementia should be considered when deciding which approach is suitable and  
36 acceptable to them, especially where there are conflicting preferences between people living with  
37 dementia and carers. In order to facilitate blended approaches and help mitigate remaining  
38 challenges, including challenges specific to dementia, continuing training in digital literacy should be  
39 incorporated into existing recommendations about education and support for people living with  
40 dementia and carers,[2] as well as the development of dementia-friendly approaches to  
41 technology.[31]  
42  
43  
44  
45  
46  
47

### 48 **Strengths and limitations**

49 One strength of this study was that it formed part of a larger study of post-diagnostic support in  
50 England and Wales, allowing us to contextualise changes. Interviews were retrospective, capturing  
51 changes that had happened over time. Participants were geographically diverse and from a range of  
52 different health and third-sector services. Limitations include a relatively small sample size with  
53 limited social care input. However, this reflects the small number of social care services included in  
54 the sample from the original study;[26] recruitment of new participants was constrained by services  
55 remaining closed or at reduced capacity during the recruitment period.  
56  
57  
58  
59  
60

## Implications for practice and policy

Our data demonstrate that positive lessons can be learned to improve the response to the lingering effects of COVID-19 and create service provision that is more resilient to future pandemics or other periods of disruption. Firstly, addressing existing challenges to post-diagnostic support, such as integration between services and sectors, could help services and professionals better cope with crises and reduce inequalities of provision. Secondly, services which continued to function during COVID-19 learned to manage persistent uncertainty by generating and embracing creative solutions, including rapid uptake of new technologies, leading to benefits for both service providers and users. Better support and training are still needed to enable professionals, people living with dementia and carers to make best use of technology within usual care; the increased uptake of remote working in this period has prepared the groundwork for blended working approaches to become the 'new norm', although it is important to ensure that this is appropriate for people living with dementia. Finally, it is vital that future pandemic policy and healthcare action plans adopt a more person-centred and flexible approach to risk management for subgroups of the population like people living with dementia where the risks of COVID-19 infection should be balanced with other risks such as isolation, as with other aspects of dementia care and support.

## ACKNOWLEDGEMENTS

Administrative support was provided by Angela Mattison. We thank all participants for their support and involvement in the study. The PriDem study team is led by Professor Dame Louise Robinson (Newcastle University) and also includes Louise Allan (University of Exeter), Claire Bamford (Newcastle University), Sube Banerjee (University of Plymouth), Greta Brunskill (Newcastle University), Alistair Burns (NHS England and NHS Improvement), Sophie Dimitriadis (International Longevity Centre), Karen Harrison Dening (Dementia UK), Sarah Griffiths (University College London), Derek King (London School of Economics), Martin Knapp (London School of Economics), Doug Lewins (PPI co-applicant), Jill Manthorpe (King's College London), Greta Rait (University College London), Emily Spencer (University College London), Sue Tucker (PPI co-applicant), Kate Walters (University College London), Jane Wilcock (University College London) and Raphael Wittenberg (London School of Economics). A conference abstract related to this work was previously published.

## FUNDING

This work was supported by funding from Alzheimer's Society Centre of Excellence grant number 331; the funder played no role in data collection, interpretation or reporting.

## COMPETING INTERESTS

The authors declare they have no competing interests.

## AUTHOR CONTRIBUTIONS

AW, MP and LR conceived and designed the study and drafted the manuscript. AW and MP collected and analysed the qualitative data. Members of the PriDem study team revised and approved the final manuscript.

## DATA SHARING STATEMENT

Qualitative dataset available upon reasonable request from data.ncl: [DOI pending]

## PATIENT AND PUBLIC INVOLVEMENT STATEMENT

A multi-stakeholder Dementia Care Community (DCC) group was established as part of the wider PriDem programme to inform all stages of the research, involving people with dementia, their family members, and health and social care professionals from a range of organisations. The PriDem study project team includes two PPI co-applicants (DL and ST) who were involved in the management of the programme.

## REFERENCES

1. Alzheimer's Disease International. World Alzheimer Report 2016. Improving healthcare for people with dementia London: Alzheimer's Disease International; 2016 [Available from: <https://www.alz.co.uk/research/world-report-2016>].
2. National Institute for Health and Care Excellence. Dementia: assessment, management and support for people living with dementia and their carers (NG97). 2018 20 June. Contract No.: NG97.
3. NHS England. The Well Pathway for Dementia 2016 [Available from: <https://www.england.nhs.uk/mentalhealth/wp-content/uploads/sites/29/2016/03/dementia-well-pathway.pdf>].
4. World Health Organisation. Global action plan on the public health response to dementia 2017-2025 Geneva: World Health Organisation; 2017 [Available from: <https://apps.who.int/iris/bitstream/handle/10665/259615/9789241513487-eng.pdf?sequence=1>].
5. Alzheimer's Disease International. From Plan to Impact IV: Progress towards targets of the WHO Global action plan on dementia. London: Alzheimer's Disease International; 2021.
6. NHS England and NHS Improvement. 2020/21 General Medical Services (GMS) contract Quality and Outcomes Framework (QOF) 2020 [Available from: <https://www.england.nhs.uk/wp-content/uploads/2020/09/C0713-202021-General-Medical-Services-GMS-contract-Quality-and-Outcomes-Framework-QOF-Guidance.pdf>].
7. Frost R, Walters K, Wilcock J, et al. Mapping post-diagnostic dementia care in England: an e-survey. *Journal of Integrated Care*. 2020.
8. Wheatley A, Bamford C, Brunskill G, et al. Implementing post-diagnostic support for people living with dementia in England: a qualitative study of barriers and strategies used to address these in practice. *Age and Ageing*. 2021.
9. Alzheimer's Society. From diagnosis to end of life: The lived experiences of dementia care and support. Alzheimer's Society and the Peter Sowerby Foundation; 2020 October 2020.
10. British Medical Association. The hidden impact of COVID-19 on patient care in the NHS in England London: British Medical Association; 2020 [Available from: [https://www.bma.org.uk/media/2840/the-hidden-impact-of-covid\\_web-pdf.pdf](https://www.bma.org.uk/media/2840/the-hidden-impact-of-covid_web-pdf.pdf)].
11. Alzheimer's Society. Worst hit: dementia during coronavirus. Alzheimer's Society; 2020 September 2020.
12. Burns A, Howard R. COVID-19 and dementia: A deadly combination. *Int J Geriatr Psychiatry*. 2021;36(7):1120-1.
13. Liu KY, Howard R, Banerjee S, et al. Dementia wellbeing and COVID-19: Review and expert consensus on current research and knowledge gaps. *Int J Geriatr Psychiatry*. 2021.
14. Institute for Government. Timeline of UK coronavirus lockdowns, March 2020 to March 2021 London: IfG; 2021 [Available from: <https://www.instituteforgovernment.org.uk/sites/default/files/timeline-lockdown-web.pdf>].
15. Tuijt R, Frost R, Wilcock J, et al. Life under lockdown and social restrictions - the experiences of people living with dementia and their carers during the COVID-19 pandemic in England. *BMC Geriatrics*. 2021;21(1).

16. Giebel C, Cannon J, Hanna K, et al. Impact of COVID-19 related social support service closures on people with dementia and unpaid carers: a qualitative study. *Aging Ment Health*. 2020;1-8.
17. Talbot CV, Briggs P. 'Getting back to normality seems as big of a step as going into lockdown': the impact of the COVID-19 pandemic on people with early to middle stage dementia. *Age Ageing*. 2021;50(3):657-63.
18. Tsapanou A, Papatriantafyllou JD, Yiannopoulou K, et al. The impact of COVID-19 pandemic on people with mild cognitive impairment/dementia and on their caregivers. *Int J Geriatr Psychiatry*. 2021;36(4):583-7.
19. Lim RHM, Shalhoub R, Sridharan BK. The experiences of the community pharmacy team in supporting people with dementia and family carers with medication management during the COVID-19 pandemic. *Research in Social and Administrative Pharmacy*. 2021;17(1):1825-31.
20. Bhome R, Huntley J, Dalton-Locke C, et al. Impact of the COVID-19 pandemic on older adults mental health services: A mixed methods study. *International Journal of Geriatric Psychiatry*. 2021.
21. Banerjee D, Vajawat B, Varshney P, et al. Perceptions, Experiences, and Challenges of Physicians Involved in Dementia Care During the COVID-19 Lockdown in India: A Qualitative Study. *Frontiers in Psychiatry*. 2021;11.
22. PriDem study project team. Primary care-led post diagnostic Dementia Care (PriDem): developing evidence-based, person-centred sustainable models for future care 2021 [Available from: <https://research.ncl.ac.uk/pridem/>].
23. Wheatley A, Poole M, Robinson L. 211 - Changes to post-diagnostic dementia support in England and Wales during the COVID-19 pandemic. *International Psychogeriatrics*. 2021;33(S1):13-.
24. British Geriatrics Society. BGS statement on research for older people during the COVID-19 pandemic 2020 [Available from: <https://www.bgs.org.uk/resources/covid-19-bgs-statement-on-research-for-older-people-during-the-covid-19-pandemic>].
25. Braun V, Clarke V. Conceptual and design thinking for thematic analysis. *Qualitative Psychology*. 2021.
26. Wheatley A, Bamford C, Brunskill G, et al. Task-shifted approaches to postdiagnostic dementia support: a qualitative study exploring professional views and experiences. *BMJ Open*. 2020;10:e040348.
27. Bamford C, Wheatley A, Brunskill G, et al. Key components of post-diagnostic support for people with dementia and their carers: a qualitative study *PLoS One*. In press.
28. Gale NK, Heath G, Cameron E, et al. Using the framework method for the analysis of qualitative data in multi-disciplinary health research. *BMC Medical Research Methodology*. 2013;13(117):1-8.
29. Miralles O, Sanchez-Rodriguez D, Marco E, et al. Unmet needs, health policies, and actions during the COVID-19 pandemic: a report from six European countries. *Eur Geriatr Med*. 2021;12(1):193-204.
30. Poole M, Davis N, Robinson L. Massive Open Online Courses: enhancing caregiver education and support about dementia care towards and at end of life. *Age and Ageing*. 2019;49(2):171-4.
31. Di Lorito C, Duff C, Rogers C, et al. Tele-Rehabilitation for People with Dementia during the COVID-19 Pandemic: A Case-Study from England. *Int J Environ Res Public Health*. 2021;18(4).
32. Dowson B, Schneider J. Online singing groups for people with dementia: scoping review. *Public Health*. 2021;194:196-201.

## PriDem topic guide for COVID-19 follow up interviews

Introduction, review of consent, confirmation of permission to audio record the interview.

### SECTION 1 – CHANGES IN POST DIAGNOSTIC SUPPORT DURING THE PANDEMIC

1.1 Just to remind you, we are interested in post-diagnostic support for people with dementia and their families. **What are the key changes that have been made to post-diagnostic dementia services during the pandemic?**

If necessary, prompt for

- Frequency/length/content of appointments/sessions
- Face to face vs virtual/telephone
- Access for professionals to other services and specialties
- MDT meetings
- Training
- Changes in caseload/workload or role
- Funding/recommissioning services
- Policy and priority shifts
- Recording/reviewing KPIs and outcomes
- Anything that stayed the same
- Variation according to phase of lockdown

1.2 **What impact have the changes had?**

- On staff
- On PWD/families
- Any positives/benefits?

1.3 **Which changes do you think might continue once we are 'back to normal'?**

### SECTION 2 – THE PRIDEM INTERVENTION

Briefly, our PriDem intervention will provide a dementia specialist, likely a nurse, who will work across a primary care network. The specialist will be involved in improving systems and pathways; training generalist staff; and assisting with the care of complex patients.

**Is there anything specific to the pandemic or changes made as a result of the pandemic that we need to consider when setting up our intervention?**

### SECTION 3 – WRAPPING UP

**Is there anything else you would like to say before we wrap up?**

## Standards for Reporting Qualitative Research (SRQR)\*

<http://www.equator-network.org/reporting-guidelines/srqr/>

Page/line no(s).

### Title and abstract

|                                                                                                                                                                                                                                                              |   |
|--------------------------------------------------------------------------------------------------------------------------------------------------------------------------------------------------------------------------------------------------------------|---|
| <p><b>Title</b> - Concise description of the nature and topic of the study Identifying the study as qualitative or indicating the approach (e.g., ethnography, grounded theory) or data collection methods (e.g., interview, focus group) is recommended</p> | 1 |
| <p><b>Abstract</b> - Summary of key elements of the study using the abstract format of the intended publication; typically includes background, purpose, methods, results, and conclusions</p>                                                               | 2 |

### Introduction

|                                                                                                                                                                     |   |
|---------------------------------------------------------------------------------------------------------------------------------------------------------------------|---|
| <p><b>Problem formulation</b> - Description and significance of the problem/phenomenon studied; review of relevant theory and empirical work; problem statement</p> | 3 |
| <p><b>Purpose or research question</b> - Purpose of the study and specific objectives or questions</p>                                                              | 3 |

### Methods

|                                                                                                                                                                                                                                                                                                                                                                                                             |     |
|-------------------------------------------------------------------------------------------------------------------------------------------------------------------------------------------------------------------------------------------------------------------------------------------------------------------------------------------------------------------------------------------------------------|-----|
| <p><b>Qualitative approach and research paradigm</b> - Qualitative approach (e.g., ethnography, grounded theory, case study, phenomenology, narrative research) and guiding theory if appropriate; identifying the research paradigm (e.g., postpositivist, constructivist/ interpretivist) is also recommended; rationale**</p>                                                                            | 3   |
| <p><b>Researcher characteristics and reflexivity</b> - Researchers' characteristics that may influence the research, including personal attributes, qualifications/experience, relationship with participants, assumptions, and/or presuppositions; potential or actual interaction between researchers' characteristics and the research questions, approach, methods, results, and/or transferability</p> | 4   |
| <p><b>Context</b> - Setting/site and salient contextual factors; rationale**</p>                                                                                                                                                                                                                                                                                                                            | 3   |
| <p><b>Sampling strategy</b> - How and why research participants, documents, or events were selected; criteria for deciding when no further sampling was necessary (e.g., sampling saturation); rationale**</p>                                                                                                                                                                                              | 3   |
| <p><b>Ethical issues pertaining to human subjects</b> - Documentation of approval by an appropriate ethics review board and participant consent, or explanation for lack thereof; other confidentiality and data security issues</p>                                                                                                                                                                        | 5   |
| <p><b>Data collection methods</b> - Types of data collected; details of data collection procedures including (as appropriate) start and stop dates of data collection and analysis, iterative process, triangulation of sources/methods, and modification of procedures in response to evolving study findings; rationale**</p>                                                                             | 3-4 |

|                       |                                                                                                                                                                                                                                                       |     |
|-----------------------|-------------------------------------------------------------------------------------------------------------------------------------------------------------------------------------------------------------------------------------------------------|-----|
| 1<br>2<br>3<br>4<br>5 | <b>Data collection instruments and technologies</b> - Description of instruments (e.g., interview guides, questionnaires) and devices (e.g., audio recorders) used for data collection; if/how the instrument(s) changed over the course of the study | 4   |
| 6<br>7<br>8           | <b>Units of study</b> - Number and relevant characteristics of participants, documents, or events included in the study; level of participation (could be reported in results)                                                                        | 5   |
| 9<br>10<br>11<br>12   | <b>Data processing</b> - Methods for processing data prior to and during analysis, including transcription, data entry, data management and security, verification of data integrity, data coding, and anonymization/de-identification of excerpts    | 3-4 |
| 13<br>14<br>15<br>16  | <b>Data analysis</b> - Process by which inferences, themes, etc., were identified and developed, including the researchers involved in data analysis; usually references a specific paradigm or approach; rationale**                                 | 4   |
| 17<br>18<br>19<br>20  | <b>Techniques to enhance trustworthiness</b> - Techniques to enhance trustworthiness and credibility of data analysis (e.g., member checking, audit trail, triangulation); rationale**                                                                | 4   |

### Results/findings

|                      |                                                                                                                                                                                                   |               |
|----------------------|---------------------------------------------------------------------------------------------------------------------------------------------------------------------------------------------------|---------------|
| 23<br>24<br>25<br>26 | <b>Synthesis and interpretation</b> - Main findings (e.g., interpretations, inferences, and themes); might include development of a theory or model, or integration with prior research or theory | 5-11, Table 1 |
| 27<br>28<br>29       | <b>Links to empirical data</b> - Evidence (e.g., quotes, field notes, text excerpts, photographs) to substantiate analytic findings                                                               | 5-11          |

### Discussion

|                                  |                                                                                                                                                                                                                                                                                                                                                                                                             |       |
|----------------------------------|-------------------------------------------------------------------------------------------------------------------------------------------------------------------------------------------------------------------------------------------------------------------------------------------------------------------------------------------------------------------------------------------------------------|-------|
| 32<br>33<br>34<br>35<br>36<br>37 | <b>Integration with prior work, implications, transferability, and contribution(s) to the field</b> - Short summary of main findings; explanation of how findings and conclusions connect to, support, elaborate on, or challenge conclusions of earlier scholarship; discussion of scope of application/generalizability; identification of unique contribution(s) to scholarship in a discipline or field | 11-12 |
| 38<br>39                         | <b>Limitations</b> - Trustworthiness and limitations of findings                                                                                                                                                                                                                                                                                                                                            | 12    |

### Other

|                |                                                                                                                                               |    |
|----------------|-----------------------------------------------------------------------------------------------------------------------------------------------|----|
| 42<br>43<br>44 | <b>Conflicts of interest</b> - Potential sources of influence or perceived influence on study conduct and conclusions; how these were managed | 13 |
| 45<br>46       | <b>Funding</b> - Sources of funding and other support; role of funders in data collection, interpretation, and reporting                      | 13 |

\*The authors created the SRQR by searching the literature to identify guidelines, reporting standards, and critical appraisal criteria for qualitative research; reviewing the reference lists of retrieved sources; and contacting experts to gain feedback. The SRQR aims to improve the transparency of all aspects of qualitative research by providing clear standards for reporting qualitative research.



1  
2  
3  
4  
5  
6  
7  
8  
9  
10  
11  
12  
13  
14  
15  
16  
17  
18  
19  
20  
21  
22  
23  
24  
25  
26  
27  
28  
29  
30  
31  
32  
33  
34  
35  
36  
37  
38  
39  
40  
41  
42  
43  
44  
45  
46  
47  
48  
49  
50  
51  
52  
53  
54  
55  
56  
57  
58  
59  
60

\*\*The rationale should briefly discuss the justification for choosing that theory, approach, method, or technique rather than other options available, the assumptions and limitations implicit in those choices, and how those choices influence study conclusions and transferability. As appropriate, the rationale for several items might be discussed together.

**Reference:**

O'Brien BC, Harris IB, Beckman TJ, Reed DA, Cook DA. **Standards for reporting qualitative research: a synthesis of recommendations.** *Academic Medicine*, Vol. 89, No. 9 / Sept 2014  
DOI: [10.1097/ACM.0000000000000388](https://doi.org/10.1097/ACM.0000000000000388)

For peer review only
