# Supplementary material for: Changes to postdiagnostic dementia support in England and Wales during the COVID-19 pandemic: a qualitative study
Source: PubMed Central journal article supplement — BMJ Open. 2022 Feb 2;12(2):e059437. doi: 10.1136/bmjopen-2021-059437 (PMC8811272; doi:10.1136/bmjopen-2021-059437), 2022-02-02
Supplement: bmjopen-2021-059437supp001.pdf [file bmjopen-2021-059437supp001.pdf]

## PriDem topic guide for COVID-19 follow up interviews

Introduction, review of consent, confirmation of permission to audio record the interview.

### SECTION 1 – CHANGES IN POST DIAGNOSTIC SUPPORT DURING THE PANDEMIC

1.1 Just to remind you, we are interested in post-diagnostic support for people with dementia and their families. **What are the key changes that have been made to post-diagnostic dementia services during the pandemic?**

If necessary, prompt for

- Frequency/length/content of appointments/sessions
- Face to face vs virtual/telephone
- Access for professionals to other services and specialties
- MDT meetings
- Training
- Changes in caseload/workload or role
- Funding/recommissioning services
- Policy and priority shifts
- Recording/reviewing KPIs and outcomes
- Anything that stayed the same
- Variation according to phase of lockdown

1.2 **What impact have the changes had?**

- On staff
- On PWD/families
- Any positives/benefits?

1.3 **Which changes do you think might continue once we are ‘back to normal’?**

### SECTION 2 – THE PRIDEM INTERVENTION

Briefly, our PriDem intervention will provide a dementia specialist, likely a nurse, who will work across a primary care network. The specialist will be involved in improving systems and pathways; training generalist staff; and assisting with the care of complex patients.

**Is there anything specific to the pandemic or changes made as a result of the pandemic that we need to consider when setting up our intervention?**

### SECTION 3 – WRAPPING UP

**Is there anything else you would like to say before we wrap up?**
